# Supplementary material
Source: PubMed Central journal article supplement (PMC6372315)
Supplement: NIHMS1517997-supplement-11.pdf [file NIHMS1517997-supplement-11.pdf]

A

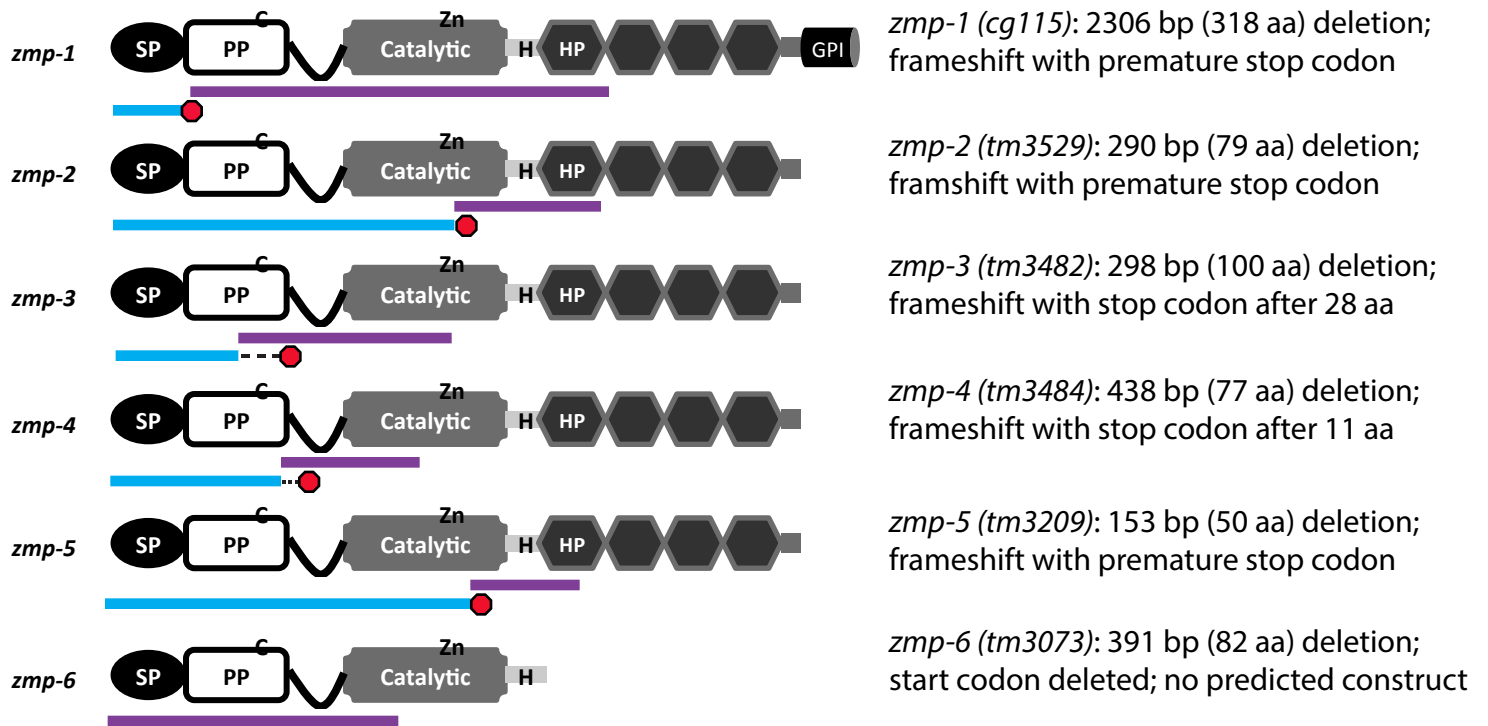

B

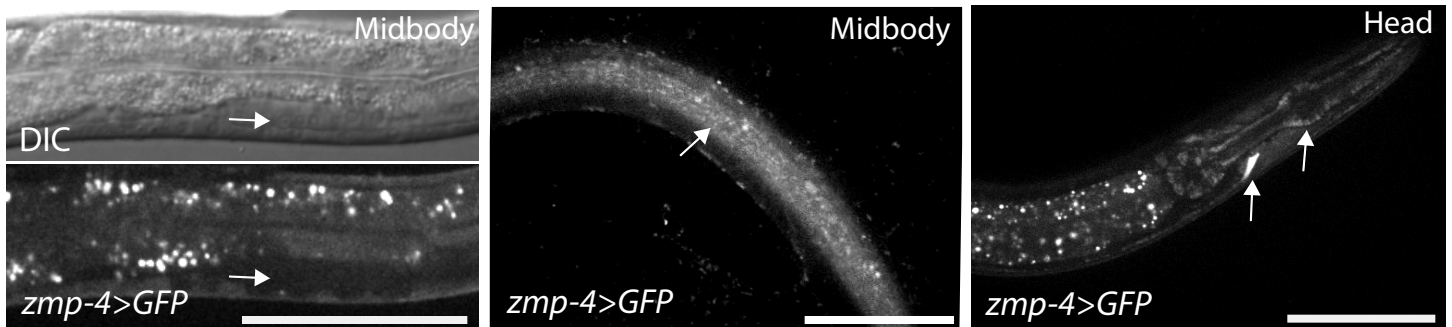

C

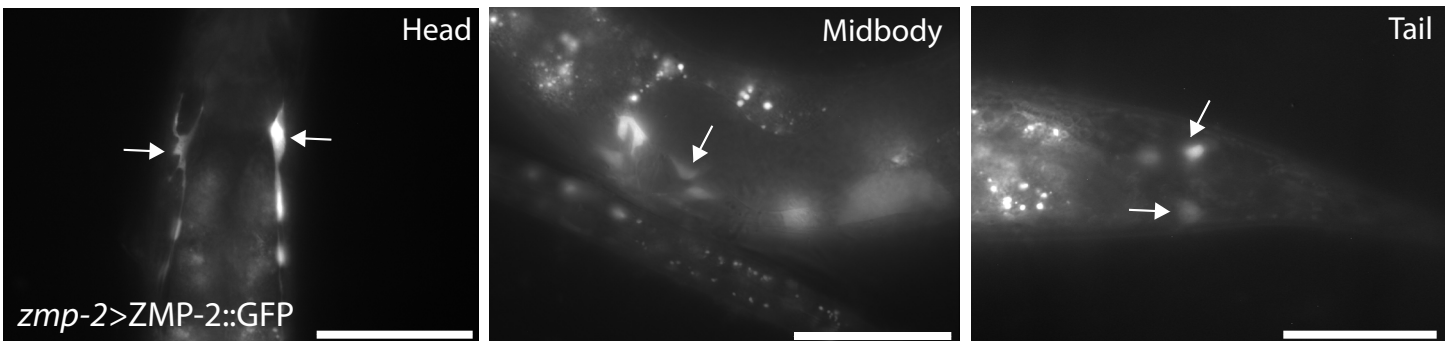

**Figure S1. *C. elegans* MMP structure, mutants, and expression; Related to Figure 1 and Table 1.** (A) Schematic representation of the protein domain structure of the six MMP (ZMP-1 through-6) orthologs are shown. All contain the catalytic metalloproteinase domain harboring the zinc (Zn) binding motif. Archetypal MMPs also include a signal peptide domain (SP), propeptide domain (PP) with a cysteine switch motif (C), a hinge region (H), and hemopexin-like domain (HP). The number of nucleotide base pairs (bp), the resulting number of amino acids (aa, referenced by span of the purple line) deleted in each *zmp* mutant allele ((*zmp-1* (*cg115*); *zmp-2* (*tm3529*); *zmp-3* (*tm3482*); *zmp-4* (*tm3484*); *zmp-5* (*tm3209*); *zmp-6* (*tm3073*)), and a brief description of the predicted protein product (referenced by blue lines, stop codon shown by red octagon) is written to the right of each structure. (B) Expression of the transcriptional reporter for *zmp-4* (*zmp-4>GFP*) is not detectable in the uterine tissue (left, DIC and fluorescence, arrow points to the AC), but is visible in the body wall muscle (arrow in middle image) and in cells in the head (arrows) at the L3 larval developmental stage when AC invasion occurs. Scale bars, 100  $\mu\text{m}$ . (C) The translational reporter for *zmp-2* (*zmp-2>ZMP-2::GFP*) is expressed in the vulval muscles (middle image, see arrow) and in multiple cells in the head and tail (see arrows in left and right images) at the L4 developmental stage. Scale bars, 20  $\mu\text{m}$ .

Kelley et al., Supplementary Figure 2

|                                |     |                                                                                                                                                                                                                                                                                                                                                    |     |
|--------------------------------|-----|----------------------------------------------------------------------------------------------------------------------------------------------------------------------------------------------------------------------------------------------------------------------------------------------------------------------------------------------------|-----|
| <a href="#">zmp-1 CCD65979</a> | 1   | --MFTgLHDILIIILFLLVTLKIA-----QNVDHTKFLQKYGYL-----                                                                                                                                                                                                                                                                                                  | 36  |
| <a href="#">zmp-2 CCD72394</a> | 1   | mtKWSpNGNPLSTIYLILSLFLAHTApt---TQHSRTTTLQLRLEDED-ggggvdedSIHFVKQMEKYGYL-----                                                                                                                                                                                                                                                                       | 68  |
| <a href="#">zmp-3 CCD66298</a> | 1   | -----MRLIYVIAIILLVSTCQAGFFSslvsrfTGGGNSSPSSSSSSSfsnsrkpslSDEKARSYLQTFGYVppnsnlsq                                                                                                                                                                                                                                                                   | 74  |
| <a href="#">zmp-4 CAB01669</a> | 1   | --MWP-----LFLLLGIIGVVSAGIPG-----TNGDIRQPNFQKELMD-----EAKVYLFKFGYmip-----e                                                                                                                                                                                                                                                                          | 50  |
| <a href="#">zmp-5 CAB08559</a> |     | -----                                                                                                                                                                                                                                                                                                                                              |     |
| <a href="#">zmp-6 CCD61839</a> |     | -----                                                                                                                                                                                                                                                                                                                                              |     |
|                                |     | ∇                                                                                                                                                                                                                                                                                                                                                  |     |
|                                |     | cysteine switch                                                                                                                                                                                                                                                                                                                                    |     |
| <a href="#">zmp-1 CCD65979</a> | 37  | ----TSGDNQLSSESLS <b>SDALKNMQRMAGLEETGEL</b> DERTIQMMER <b>PRCGHPDVE</b> DHQKSRGKRYAPPQF- <b>KWKE</b> ----K                                                                                                                                                                                                                                        | 106 |
| <a href="#">zmp-2 CCD72394</a> | 69  | ----KGIDHSSPQEF <b>RQALMFFQEVLEVEQ</b> TGNVDEMTVE <b>AASKPRCTQTDV</b> RQEQTKRTRKRFLLSKRa <b>KWAH</b> asgqsV                                                                                                                                                                                                                                        | 143 |
| <a href="#">zmp-3 CCD66298</a> | 75  | srrngMAGDIQSAEQV <b>FKSAIRKFQEFAGIAK</b> TGFLDAAT <b>KAKMALSRCGV</b> TDAPLALTSGSS----QF- <b>KWSK</b> ----T                                                                                                                                                                                                                                         | 143 |
| <a href="#">zmp-4 CAB01669</a> | 51  | phqnVKTIQEPSEKQ <b>TDALIRFQSAFLYYS</b> SGDVDP <b>TQAKMNE</b> WRCANNDMDKGQPIPPAS---KKE- <b>LWTK</b> ----K                                                                                                                                                                                                                                           | 121 |
| <a href="#">zmp-5 CAB08559</a> | 1   | ----- <b>MTVWRRWYLYILSGFI</b> INN <b>VLESKSRV</b> KRYSIEGS----- <b>YWGK</b> ----S                                                                                                                                                                                                                                                                  | 42  |
| <a href="#">zmp-6 CCD61839</a> | 1   | ----- <b>MRSILLFILLIFLFA</b> ISEAQENID <b>KNLDL</b> FKPIGFGSRE-----KRYVIRAK- <b>RWKK</b> ----H                                                                                                                                                                                                                                                     | 52  |
|                                |     | ^                                                                                                                                                                                                                                                                                                                                                  |     |
| <a href="#">zmp-1 CCD65979</a> | 107 | <b>IITYGCKAVg</b> STRISLDDLR <b>TMHQASQWSELA</b> -----DVEIVESSVK--NP-- <b>MMVISAGRENHYP</b> cTVRFDT                                                                                                                                                                                                                                                | 173 |
| <a href="#">zmp-2 CCD72394</a> | 144 | <b>TLKWI</b> ISDY-TS-DIDR <b>LETRKVV</b> EKAFL <b>WSSQS</b> Yiknekkv <b>TLTFQ</b> EAS----SKDEADINIL <b>WAE</b> GNHGD-EHDFDG                                                                                                                                                                                                                        | 216 |
| <a href="#">zmp-3 CCD66298</a> | 144 | <b>RLTYSIESW</b> --SSDLSKDDV <b>RRAISEAYLWSKVT</b> -----PLEFSEVPAG--ST--SDIKIR <b>FCVR</b> NHND-PWPFDG                                                                                                                                                                                                                                             | 208 |
| <a href="#">zmp-4 CAB01669</a> | 122 | <b>SLTYKVVNT</b> --PNTLS <b>QAQIRSA</b> AHEAFE <b>QWTRAS</b> -----GFKFVET <b>TGA</b> -T---PDITIT <b>FDV</b> PQSN--LRIAG                                                                                                                                                                                                                            | 184 |
| <a href="#">zmp-5 CAB08559</a> | 43  | <b>VITYR</b> LKQP--SQRMSL <b>SQQA</b> VFAFA <b>FATWE</b> EHT-----RLWFVAVDDE--DEQKANID <b>IVFA</b> AGDHE <b>D</b> -GFPPDG                                                                                                                                                                                                                           | 109 |
| <a href="#">zmp-6 CCD61839</a> | 53  | <b>TLTWQL</b> QTQ-NLLDPD <b>VFIVR</b> NTM <b>HRAF</b> NEWS <b>TVS</b> -----SVDFREI <b>PP</b> dlvTKQPP <b>DIYA</b> FEKGEHSD-GFPFDG                                                                                                                                                                                                                  | 122 |
|                                |     | ∇                                                                                                                                                                                                                                                                                                                                                  |     |
|                                |     | active site                                                                                                                                                                                                                                                                                                                                        |     |
| <a href="#">zmp-1 CCD65979</a> | 174 | -----KTLAH <b>AFFPT</b> ----- <b>NGQIH</b> INDRVQ <b>FAM</b> TNY--TERMGAN <b>SLYSVVA</b> HEMGHAL <b>GF</b> SH <b>SP</b> EDID <b>SV</b> MFA                                                                                                                                                                                                         | 235 |
| <a href="#">zmp-2 CCD72394</a> | 217 | angkiegnkKENVLAH <b>TFFPG</b> yarpl <b>NGDI</b> HFD <b>DAEDWE</b> IDVDQvGHG <b>SNK</b> RFFPY <b>VLA</b> HEIGHAL <b>GLD</b> HS <b>Q</b> KADAL <b>MHP</b>                                                                                                                                                                                            | 296 |
| <a href="#">zmp-3 CCD66298</a> | 209 | -----EGGVLAH <b>ATMPE</b> -----SGMFHFD <b>DENW</b> TYKDARKI <b>HN</b> NEAT <b>DL</b> LAVAI <b>HEGG</b> HT <b>LG</b> LEHS <b>RD</b> ENAI <b>M</b> AP                                                                                                                                                                                                | 274 |
| <a href="#">zmp-4 CAB01669</a> | 185 | -----S----- <b>ASKPV</b> ----- <b>NSH</b> ILDK <b>NQ</b> EWA <b>YK</b> SQA---PMG <b>ISL</b> YHT <b>LL</b> HEIGHI <b>LGL</b> PHT <b>YR</b> GS <b>IM</b> HP                                                                                                                                                                                          | 240 |
| <a href="#">zmp-5 CAB08559</a> | 110 | -----KGNILAH <b>AFFPR</b> y---GGDVH <b>FDE</b> DEL <b>WS</b> -----ANK <b>TKG</b> VD <b>LY</b> AVAV <b>HEIGH</b> SL <b>GLK</b> HS <b>SN</b> HLS <b>IM</b> AP                                                                                                                                                                                        | 170 |
| <a href="#">zmp-6 CCD61839</a> | 123 | -----QDGVVA <b>HAFYPR</b> -----DGR <b>LHF</b> DAE <b>EQ</b> W <b>SLN</b> -----SVEGV <b>NLF</b> Q <b>TAV</b> HEIGH <b>LGL</b> LEHS <b>MD</b> VRA <b>MFA</b>                                                                                                                                                                                         | 182 |
|                                |     | ∇                                                                                                                                                                                                                                                                                                                                                  |     |
| <a href="#">zmp-1 CCD65979</a> | 236 | <b>YDTPR</b> KWK----- <b>FTSMD</b> KYN <b>MRS</b> YY <b>GAK</b> ASKK <b>EN</b> EEEE <b>Er</b> kt <b>EN</b> ED <b>KR</b> ---RKTE <b>KDR</b> ---gr <b>TRE</b> HE <b>SDD</b> IR <b>NE</b> C                                                                                                                                                           | 301 |
| <a href="#">zmp-2 CCD72394</a> | 297 | <b>YYKNV</b> PINE-I---- <b>QLD</b> IDD <b>KCG</b> VI <b>WNYG</b> -----GASD---FCLY-V <b>WL</b> MSQ <b>IVE</b> AHN---SSA <b>Q</b> NNH <b>GV</b> GS <b>ITS</b>                                                                                                                                                                                        | 355 |
| <a href="#">zmp-3 CCD66298</a> | 275 | <b>FYQKT</b> TDSSGNy <b>vPNL</b> K <b>SD</b> DIS <b>AIQ</b> AI <b>YG</b> AGSGR <b>SS</b> SGSD <b>F</b> ggs <b>SGG</b> SRT <b>TAR</b> PTTT <b>TR</b> S <b>wfgr</b> FFG <b>DD</b> DD <b>D</b> VRS <b>RT</b>                                                                                                                                          | 354 |
| <a href="#">zmp-4 CAB01669</a> | 241 | <b>IFKPV</b> LLPHGT--VD <b>TV</b> PN <b>VD</b> RLA <b>IRK</b> I <b>YGL</b> SSVD <b>H</b> STPS-----* <b>S</b> DVDR-----                                                                                                                                                                                                                             | 283 |
| <a href="#">zmp-5 CAB08559</a> | 171 | <b>FYKQY</b> TGA-----VMHL <b>HQ</b> DD <b>IS</b> AV <b>KRL</b> YGA-----P <b>VK</b> IR <b>KK</b>                                                                                                                                                                                                                                                    | 203 |
| <a href="#">zmp-6 CCD61839</a> | 183 | <b>AKR</b> --PYD <b>PAF</b> ---- <b>TLG</b> DD <b>DV</b> RA <b>IR</b> SL <b>FP</b> IN <b>ET</b> DAN <b>S</b> G <b>SE</b> E--N <b>SE</b> DP <b>VT</b> V <b>KP</b> IS <b>K</b> EEG---I <b>DE</b> EN <b>ND</b> ---P <b>F</b> DA                                                                                                                       | 246 |
|                                |     | ^                                                                                                                                                                                                                                                                                                                                                  |     |
| <a href="#">zmp-1 CCD65979</a> | 302 | <b>R</b> VEN <b>P</b> I----- <b>VVQ</b> YR-GE <b>YL</b> IF <b>KS</b> Q <b>W</b> V <b>VR</b> VS <b>SD</b> W <b>R</b> L <b>I</b> IKAV <b>P</b> I                                                                                                                                                                                                     | 340 |
| <a href="#">zmp-2 CCD72394</a> | 356 | <b>S</b> RT <b>N</b> KK---S <b>FK</b> SE <b>G</b> FF <b>L</b> Q <b>L</b> K <b>F</b> PH <b>STL</b> -----T <b>H</b> T <b>DD</b> V <b>M</b> RE <b>K</b> DK <b>R</b> S <b>Y</b> RG <b>D</b> SK <b>I</b> PK <b>C</b> SN <b>N</b> S <b>S</b> Q <b>R</b> T <b>L</b> AE <b>K</b> K                                                                         | 419 |
| <a href="#">zmp-3 CCD66298</a> | 355 | <b>TR</b> RT <b>T</b> L <b>w</b> pt <b>TQ</b> SP <b>F</b> SG <b>DD</b> W <b>GS</b> GS <b>SS</b> GR <b>g</b> ss <b>sg</b> sgg <b>g</b> * <b>S</b> H <b>I</b> DA <b>Y</b> T <b>P</b> SS-S <b>F</b> S <b>Y</b> A <b>F</b> SG <b>S</b> Q <b>V</b> Y <b>T</b> IS <b>G</b> T-K--V <b>T</b> K <b>V</b> Q <b>S</b> I                                       | 430 |
| <a href="#">zmp-4 CAB01669</a> | 284 | -----SK <b>CP</b> -----K <b>H</b> L <b>D</b> S <b>VVA</b> IN <b>D</b> Q <b>E</b> W <b>L</b> F <b>R</b> SN <b>K</b> V <b>Y</b> K <b>L</b> NN <b>R</b> -K-F <b>V</b> D <b>S</b> GR <b>P</b> I                                                                                                                                                        | 324 |
| <a href="#">zmp-5 CAB08559</a> | 204 | <b>A</b> SE <b>H</b> H <b>I</b> wr <b>S</b> EL <b>CT</b> -----k <b>P</b> Y <b>L</b> DA <b>V</b> T <b>L</b> K <b>NG</b> T <b>I</b> LA <b>F</b> R <b>G</b> M <b>F</b> F <b>E</b> L <b>K</b> T <b>TR</b> K--W <b>L</b> L <b>P</b> R <b>K</b> I                                                                                                        | 254 |
| <a href="#">zmp-6 CCD61839</a> | 247 | <b>S</b> ST <b>T</b> T <b>S</b> ---S <b>S</b> S <b>P</b> D <b>S</b> FF <b>F</b> FP <b>L</b> PS <b>I</b> EH <b>F</b> Q-----R <b>R</b> ND <b>W</b> F <b>V</b> L-----                                                                                                                                                                                 | 279 |
|                                |     | ∇                                                                                                                                                                                                                                                                                                                                                  |     |
| <a href="#">zmp-1 CCD65979</a> | 341 | <b>N</b> QL <b>F</b> P <b>L</b> PN <b>P</b> IDA <b>AV</b> T <b>V</b> G--H <b>N</b> L <b>W</b> V <b>F</b> G <b>E</b> M <b>I</b> Y <b>V</b> I <b>Y</b> GN <b>H</b> -----M <b>V</b> H <b>A</b> PL <b>R</b> LS <b>D</b> -I <b>G</b> INE <b>K</b> Y <b>V</b> D <b>L</b> AY <b>E</b> W <b>H</b> y <b>f</b> N <b>P</b> PA <b>V</b> Y <b>I</b>             | 410 |
| <a href="#">zmp-2 CCD72394</a> | 420 | <b>L</b> T <b>L</b> GL <b>H</b> L <b>S</b> EAD <b>A</b> K <b>R</b> Y <b>TE</b> M--V <b>C</b> N <b>F</b> LAG <b>L</b> H <b>M</b> W <b>R</b> T <b>N</b> PN <b>H</b> As--E <b>S</b> LE <b>K</b> E <b>Y</b> K <b>G</b> V <b>S</b> Q <b>e</b> M <b>G</b> T <b>F</b> SG <b>K</b> S <b>I</b> AV <b>R</b> RL <b>I</b> r--H <b>A</b> E <b>H</b> Q           | 491 |
| <a href="#">zmp-3 CCD66298</a> | 431 | <b>H</b> DL <b>F</b> PS <b>A</b> PT <b>P</b> V <b>N</b> AAL <b>W</b> NP <b>is</b> GS <b>M</b> LL <b>F</b> SS <b>N</b> RV <b>S</b> Y <b>S</b> Y <b>F</b> SN <b>R</b> q <b>if</b> Q <b>M</b> DS <b>G</b> F <b>P</b> K <b>T</b> LP <b>S</b> ---D <b>L</b> GF <b>S</b> V <b>S</b> G <b>A</b> L <b>R</b> W <b>I</b> --N <b>H</b> Q <b>I</b> LM          | 505 |
| <a href="#">zmp-4 CAB01669</a> | 325 | <b>Q</b> Q <b>V</b> F <b>P</b> RG <b>P</b> Q <b>F</b> V <b>N</b> AT <b>V</b> SS <b>G</b> --P <b>L</b> T <b>L</b> L <b>F</b> VE <b>R</b> T <b>I</b> Y <b>G</b> E <b>Y</b> D <b>G</b> V <b>Q</b> --f <b>T</b> E <b>A</b> PN <b>Y</b> PK <b>E</b> L <b>H</b> D-R <b>V</b> L <b>F</b> Y <b>P</b> Q <b>G</b> A <b>F</b> PL <b>N</b> NG----S <b>V</b> IL | 394 |
| <a href="#">zmp-5 CAB08559</a> | 255 | <b>N</b> R <b>I</b> F <b>P</b> -F <b>E</b> G <b>P</b> LE <b>A</b> AT <b>D</b> R-h <b>G</b> N <b>V</b> Y <b>F</b> FK <b>K</b> D <b>T</b> Y <b>W</b> MT <b>K</b> H <b>G</b> ----D <b>M</b> M <b>N</b> Y <b>P</b> K <b>K</b> I <b>S</b> Q <b>L</b> T <b>D</b> T <b>P</b> D <b>G</b> INA <b>A</b> LY <b>H</b> --E <b>D</b> G <b>K</b> P <b>Y</b> F     | 325 |
| <a href="#">zmp-6 CCD61839</a> |     | -----                                                                                                                                                                                                                                                                                                                                              |     |
|                                |     | ∇                                                                                                                                                                                                                                                                                                                                                  |     |
| <a href="#">zmp-1 CCD65979</a> | 411 | <b>W</b> K <b>G</b> S <b>R</b> Y <b>W</b> K <b>L</b> D-E---K <b>M</b> Y <b>H</b> R <b>R</b> V <b>D</b> ER <b>Y</b> PK <b>d</b> tl <b>n</b> war <b>V</b> PK <b>G</b> V <b>H</b> SA <b>F</b> T <b>Y</b> E---KE <b>I</b> H <b>L</b> L <b>R</b> GN <b>Q</b> V <b>F</b> R <b>M</b> NS <b>S</b> R <b>S</b> v <b>f</b> DI <b>a</b> D <b>G</b> Y           | 481 |
| <a href="#">zmp-2 CCD72394</a> | 492 | <b>K</b> ER <b>S</b> E <b>K</b> GL <b>D</b> p <b>D</b> Y <b>F</b> DD <b>D</b> FF <b>E</b> N <b>F</b> ME <b>Y</b> SK-----                                                                                                                                                                                                                           | 519 |
| <a href="#">zmp-3 CCD66298</a> | 506 | <b>S</b> SG <b>D</b> E <b>F</b> AV <b>Y</b> D-E <b>F</b> W <b>N</b> Q <b>V</b> T <b>L</b> K <b>N</b> R <b>I</b> SS <b>Y</b> FP <b>N</b> -----L <b>P</b> RG <b>V</b> K <b>G</b> V <b>E</b> SP <b>A</b> G---S <b>V</b> IT <b>A</b> FT <b>S</b> N <b>Q</b> V <b>F</b> E <b>Y</b> NS <b>R</b> T <b>K</b> --S <b>I</b> --G <b>R</b>                     | 569 |
| <a href="#">zmp-4 CAB01669</a> | 395 | <b>L</b> SG <b>N</b> V <b>F</b> AT <b>Y</b> N-V <b>Q</b> Q <b>N</b> AP <b>S</b> FL <b>N</b> DK <b>N</b> RY <b>FP</b> N-----L <b>P</b> ED <b>I</b> K <b>S</b> G <b>I</b> E <b>K</b> T <b>Q</b> g <b>ft</b> DA <b>Y</b> Y <b>M</b> F <b>E</b> AT <b>V</b> SD <b>Y</b> DM <b>N</b> SK----Q <b>V</b> L                                                 | 460 |
| <a href="#">zmp-5 CAB08559</a> | 326 | <b>F</b> K <b>K</b> S <b>Y</b> F <b>W</b> Q <b>Y</b> S-R <b>Y</b> G <b>K</b> H <b>K</b> L <b>W</b> P <b>R</b> A <b>I</b> V <b>S</b> I <b>F</b> EN <b>q</b> n-----S <b>P</b> PE <b>I</b> DA <b>A</b> F <b>Q</b> L <b>N</b> --T <b>S</b> S <b>F</b> L <b>H</b> Q <b>N</b> K <b>Y</b> W <b>K</b> V <b>S</b> GD <b>P</b> M--R <b>I</b> e <b>K</b> GF   | 393 |
| <a href="#">zmp-6 CCD61839</a> |     | -----                                                                                                                                                                                                                                                                                                                                              |     |
|                                |     | ∇                                                                                                                                                                                                                                                                                                                                                  |     |
|                                |     | transmembrane                                                                                                                                                                                                                                                                                                                                      |     |
| <a href="#">zmp-1 CCD65979</a> | 482 | <b>P</b> Q <b>P</b> L <b>Q</b> S <b>F</b> FG <b>F</b> CP <b>Ek</b> lvln <b>S</b> ss <b>h</b> fs <b>l</b> iyat <b>i</b> l <b>i</b> l <b>i</b> l <b>i</b> f                                                                                                                                                                                          | 521 |
| <a href="#">zmp-2 CCD72394</a> |     | -----                                                                                                                                                                                                                                                                                                                                              |     |
| <a href="#">zmp-3 CCD66298</a> | 570 | <b>Q</b> SG <b>F</b> SS-Y <b>I</b> AC-----                                                                                                                                                                                                                                                                                                         | 579 |
| <a href="#">zmp-4 CAB01669</a> | 461 | <b>Q</b> L <b>Q</b> N <b>I</b> P <b>D</b> FL <b>K</b> CT-----                                                                                                                                                                                                                                                                                      | 472 |
| <a href="#">zmp-5 CAB08559</a> | 394 | <b>P</b> RSLS <b>R</b> D <b>W</b> F <b>N</b> CL-----                                                                                                                                                                                                                                                                                               | 405 |
| <a href="#">zmp-6 CCD61839</a> |     | -----                                                                                                                                                                                                                                                                                                                                              |     |

signal sequence

GPI anchor site

∇ metallopeptidase domain boundary

\*hemopexin-like domain boundary

deleted sequence in MMP- animals

**Figure S2. Amino acid sequences of the *C. elegans* MMPs; Related to Figure 1 and STAR Methods.** The sequence alignment of the six *C. elegans* ZMP proteins are shown. All six ZMPs have a signal sequence (underlined), a highly conserved metallopeptidase and hemopexin-like domain (found within the arrowheads or asterisks, respectively), a cysteine switch, and an active site (both labeled and are bounded by black lines). In addition, ZMP-1 has a transmembrane domain and a GPI anchor site (yellow) at the end of the sequence. The span of amino acids included in the deletions used in the manuscript are highlighted in grey ((*zmp-1* (*cg115*); *zmp-2* (*tm3529*); *zmp-3* (*tm3482*); *zmp-4* (*tm3484*); *zmp-5* (*tm3209*); *zmp-6* (*tm3073*)).

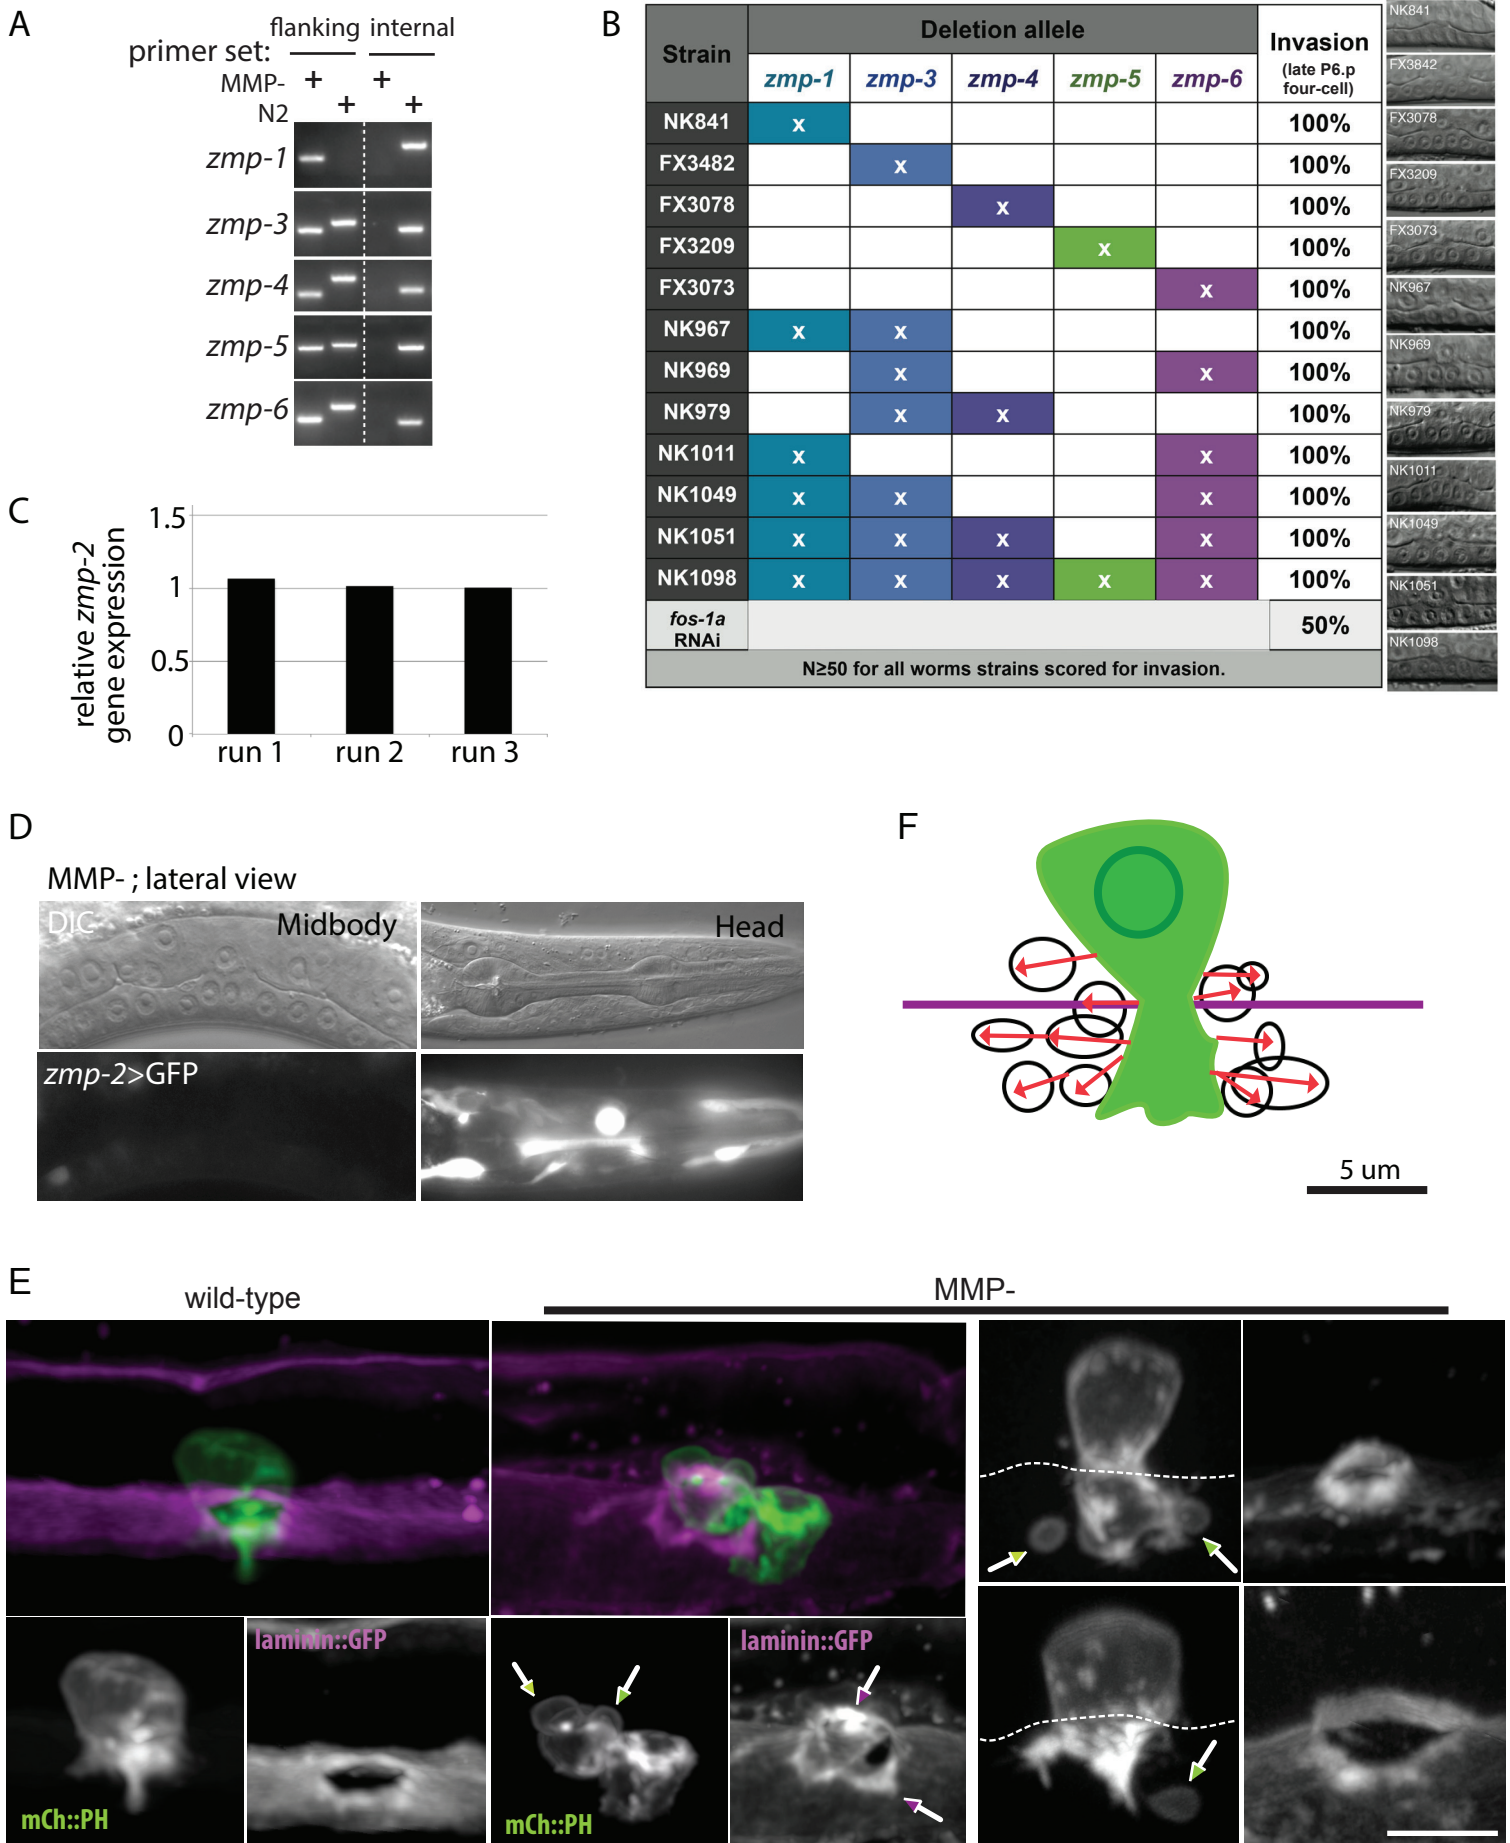

**Figure S3. MMPs are not required for BM removal under the AC; Related to Table 1, Figure 3, and STAR Methods.** (A) PCR genotyping analysis of wild-type (N2) and MMP- quintuple-mutant worms. Amplification products from primer sets flanking (left) or internal (right) to the region of genetic deletion are shown. (B) The table displays the putative *zmp*-deletion alleles analyzed alone, and in combination for invasion at the late P6.p four-cell VPC developmental stage (see Figure 1B). A representative DIC image for each strain is shown to the right. RNAi targeting *fos-1a* was used as a control for blocked invasion. (C) RT-qPCR analysis of whole worms shows no compensatory upregulation of *zmp-2* gene expression in MMP- animals. Values represent the relative gene expression of *zmp-2* in MMP- worms relative to wild type animals and normalized to the reference gene (Y45F10D.4). Three trials (runs) are shown ( $1.03 \pm 0.03$ ; Mean  $\pm$  SD). (D) (Left panels) No expression of the transcriptional *zmp-2*> GFP reporter is detectable within or around the AC in animals in MMP- animals (images represent > 10 animals imaged for each strain). (Right panels) Similar exposure showing expression of *zmp-2*> GFP in the head region of the same animal. (E) Distinctive spherical membrane morphology displayed in MMP- animals. A representative wild type and MMP- animal shows an MMP-AC (visualized with membrane marker mCherry::PLC $\Delta^{\text{PH}}$ , grey, green in merged images) displaying membrane blebs and cell fragments (seen in ~30% of MMP- animals n > 100) that are not seen in wild-type worms. Laminin (laminin::GFP) is also shown alone (grey) or in merged images (magenta). (F) Illustration depicting the location (black circles) and attachment points (red arrows) on ACs (green) from 10 animals that harbored membrane spheres relative to the BM (magenta line). Scale bars, 5  $\mu\text{m}$ .



A

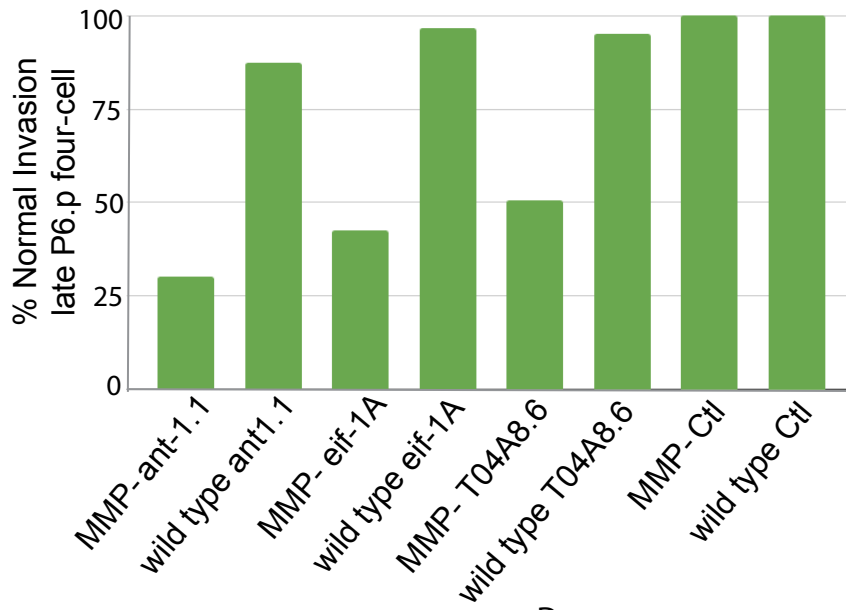

B

*ant-1.1*>ANT-1.1::GFP

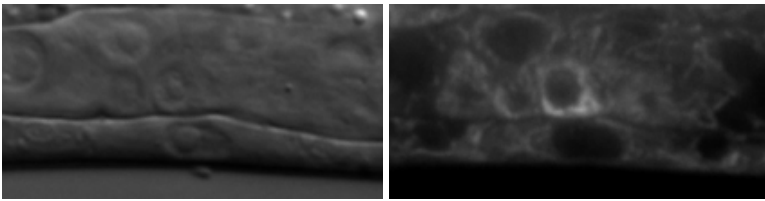

D

*eif-1.A*>EIF-1.A::GFP

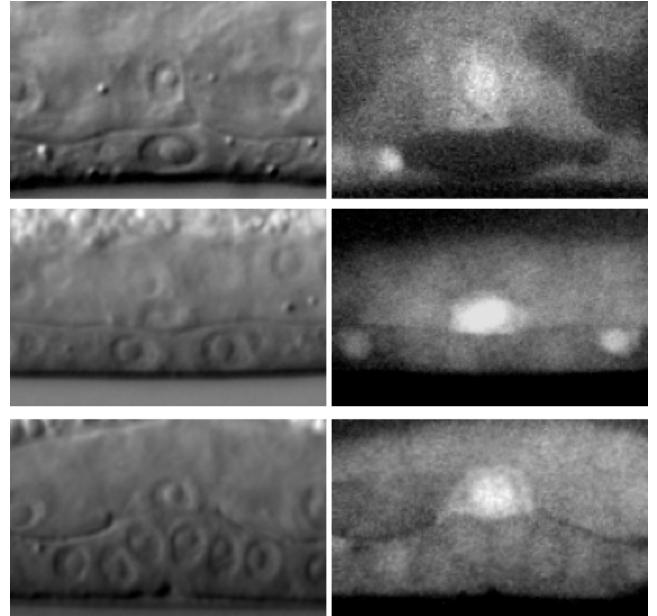

C

T04A8.6>T04A8.6::GFP

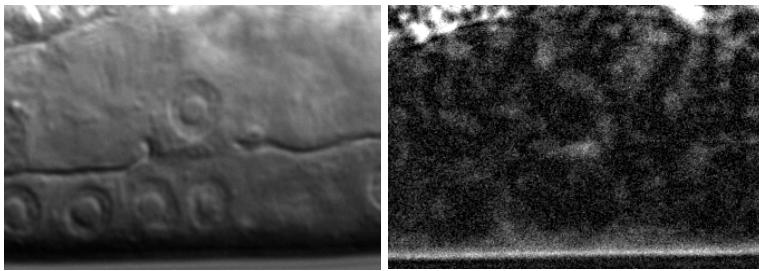

E Lateral view; WT animals; Mitochondria in the protrusion

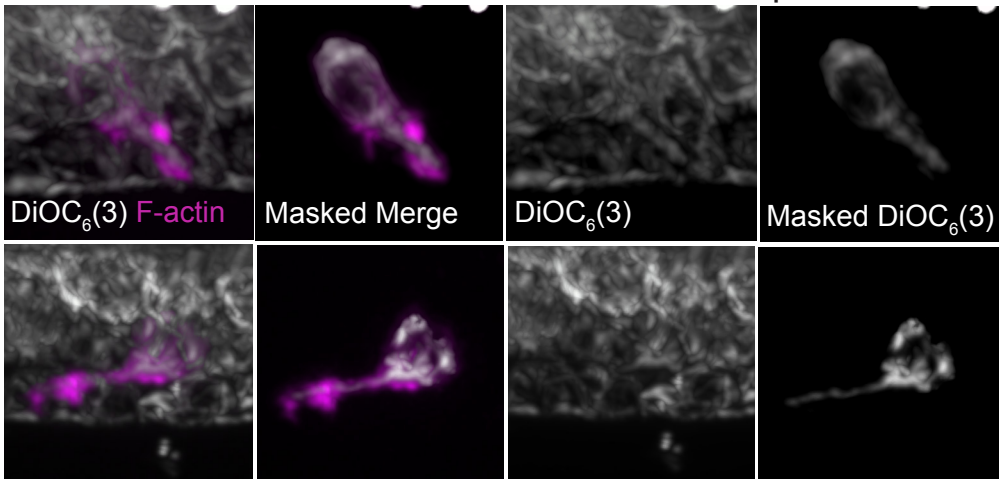

**Figure S4. A whole-genome MMP- synergistic AC invasion interaction screen identifies three genes; Related to Figure 6. (A)** The percent of animals showing normal invasion after RNAi targeting *ant-1.1*, *eif-1a*, *T04A8.6* or L4440 control at the early P6.p 4-cell VPC developmental stage are shown (data from Table S1). AC expression (arrows) of **(B)** ANT-1.1 protein (*ant-1.1>ANT-1.1::GFP*) at P6.p 2-cell stage **(C)** T04A8.6 protein (*T04A8.6>T04A8.6::GFP*) at P6.p 4-cell stage, and **(D)** EIF-1.A protein (*eif-1.A>EIF-1.A::GFP*) at P6.p 1- (top), 2- (middle), and 4-cell (bottom) VPC stages are shown to the right of corresponding DIC images. Scale bars, 5  $\mu$ m. **(E)** Mitochondria and F-actin the invasive the invasive protrusion in wild type animals. Mitochondria staining is shown alone (DIOC<sub>6</sub>(3)); white, or merged with F-actin (mCherry::moeABD; magenta).
